# Supplementary material for: Efficacy of Dulaglutide as a First Injectable Option for Patients with Type 2 Diabetes: A Post-Hoc Pooled Analysis
Source: Springer Nature journal article supplement (doi:10.1007/s13300-019-00709-9), 2019-10-11
Supplement: MOESM1 [file 17264786]

**Supplemental Table 1. Hypoglycemia Episodes Through 6 Months by OH Subgroup and Overall Population**

| **Episode Type** | **MET**  **N=712** | **SU**  **N=270** | **MET+SU**  **N=390** | **MET+PIO**  **N=279** | **MET+SGLT-2i**  **N=133** | **Overall**  **N=1784** |
| --- | --- | --- | --- | --- | --- | --- |
| **Plasma Glucose ≤70 mg/dL (3.9 mmol/L)** |  |  |  |  |  |  |
| Total Hypoglycemia | 59 (8.3) | 53 (19.6) | 170 (43.6) | 29 (10.4) | 6 (4.5) | 317 (17.8) |
| Documented Symptomatic Hypoglycemia | 28 (3.9) | 28 (10.4) | 104 (26.7) | 14 (5.0) | 2 (1.5) | 176 (9.9) |
| Nocturnal Hypoglycemia | 6 (0.8) | 17 (6.3) | 64 (16.4) | 4 (1.4) | 2 (1.5) | 93 (5.2) |
| **Plasma Glucose <54 mg/dL (3.0 mmol/L)** |  |  |  |  |  |  |
| Total Hypoglycemia | 13 (1.8) | 14 (5.2) | 56 (14.4) | 3 (1.1) | 1 (0.8) | 87 (4.9) |
| Documented Symptomatic Hypoglycemia | 2 (0.3) | 7 (2.6) | 34 (8.7) | 0 (0.0) | 1 (0.8) | 44 (2.5) |
| Nocturnal Hypoglycemia | 0 (0.0) | 0 (0.0) | 17 (4.4) | 0 (0.0) | 0 (0.0) | 17 (1.0) |
| **Severe Hypoglycemia** | 0 (0.0) | 0 (0.0) | 1 (0.3) | 0 (0.0) | 0 (0.0) | 1 (0.1) |

Data are presented as n (%). Documented symptomatic hypoglycemia was defined as any time a patient felt that they were experiencing symptoms and/or signs associated with hypoglycemia, and had a plasma glucose level of ≤70 mg/dL (3.9 mmol/L). Nocturnal hypoglycemia was defined as any hypoglycemic event that occurred between bedtime and waking and probable symptomatic hypoglycemia was defined as an event during which symptoms of hypoglycemia were not accompanied by a plasma glucose determination (but that was presumably caused by a plasma glucose level of ≤70 mg/dL [3.9 mmol/L]). Severe hypoglycemia was defined as an episode requiring the assistance of another person to actively administer therapy.

**Supplemental Table 2. Gastrointestinal Events Through 6 Months by OH Subgroup and Overall Population**

| **Event Type** | **MET**  **N=712** | **SU**  **N=270** | **MET+SU**  **N=390** | **MET+PIO**  **N=279** | **MET+SGLT-2i**  **N=133** | **Overall**  **N=1784** |
| --- | --- | --- | --- | --- | --- | --- |
| Nausea | 126 (17.7) | 28 (10.4) | 54 (13.8) | 97 (34.8) | 25 (18.8) | 330 (18.5) |
| Diarrhea | 103 (14.5) | 27 (10.0) | 51 (13.1) | 77 (27.6) | 8 (6.0) | 266 (14.9) |
| Vomiting | 61 (8.6) | 12 (4.4) | 25 (6.4) | 52 (18.6) | 6 (4.5) | 156 (8.7) |

Data are presented as n (%).
